# Supplementary figures and images for: Tailoring graphene oxide assemblies by pinning on the contact line of a dissolving microdroplet
Source: Royal Society of Chemistry journal article supplement (doi:10.1039/c5sm01731a), 2015-01-01

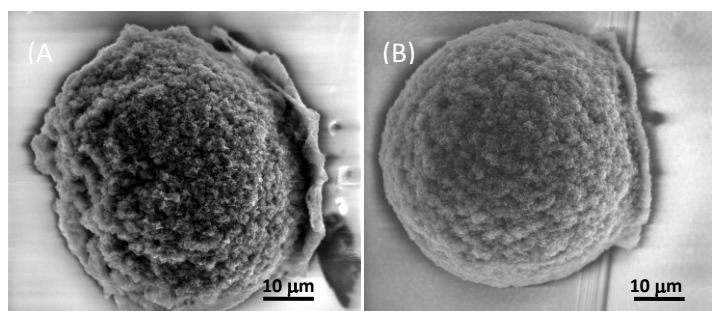

Fig. S1. SEM images of two GO assemblies on a substrate with a trough (A) or a step (B).

Supplement: c5sm01731a1.pdf [file c5sm01731a1.pdf]
